# Supplementary material for: Maternal Exposure to Cigarette Smoke during Pregnancy and Testicular Cancer in Offspring: A Systematic Review and Meta-Analysis
Source: MDPI journal article supplement (doi:10.3390/life13030618), 2023-02-23
Supplement: s1 [file s1]

**Table S2.** Standardized form for the evaluation of completeness of reporting and risk of bias template

**Systematic review: Maternal Exposure to Cigarette Smoking During Pregnancy and Testicular Cancer in Offspring: A Systematic Review and Meta-analysis.**

Key-paper rating form for [ADD ARTICLE NAME HERE]:

A. Article and rater identification

B. Extraction of study characteristics

C. Completeness of reporting (adapted from Bonzini M *et al.* Occup Environ Med 2007)

D. Assessment of bias and confounding (adapted from Shamliyan TA *et al.* J Clin Epidemiol 2011 for specific needs for this review)

| <b>A. Article and rater identification</b>                                                                                                                                           |  |
|--------------------------------------------------------------------------------------------------------------------------------------------------------------------------------------|--|
| Date for assessment                                                                                                                                                                  |  |
| Rater name                                                                                                                                                                           |  |
| First author, title, and publication year                                                                                                                                            |  |
| <b>Extraction of study characteristics</b>                                                                                                                                           |  |
| Location (country/region/area)                                                                                                                                                       |  |
| Source population (general, defined by area, occupation, patients)                                                                                                                   |  |
| Study design [cross-sectional, (nested) case control, cohort, ecological]                                                                                                            |  |
| Population size (exposed/unexposed; cases/referents)                                                                                                                                 |  |
| Exposure ascertainment [self-administered questionnaire, interview, biological samples (type if applicable: serum, cord blood, placenta, amniotic fluid, breast milk, urine, other)] |  |
| Method chemical analysis ( <i>if applicable</i> , biological samples)                                                                                                                |  |
| Outcome ascertainment (self-report, interview, examination, medical record, registry)                                                                                                |  |
| Exposure contrast/exposure groups (e.g., maternal smoking vs non-smoking)                                                                                                            |  |
| Estimate, 95% CI. (Contact authors if not provided)                                                                                                                                  |  |
| Remarks (optional)                                                                                                                                                                   |  |
| <b>C. Completeness of reporting (is adequate information provided or not? No assessment of quality)</b>                                                                              |  |
| Each issue is rated with 1 (adequate information) or 0 (not enough description), if 0, briefly indicate the main reason                                                              |  |
| 1. Study design                                                                                                                                                                      |  |
| 2. Sampling frame and procedures                                                                                                                                                     |  |
| 3. Inclusion and exclusion criteria                                                                                                                                                  |  |

|                                                                       |  |
|-----------------------------------------------------------------------|--|
| 4. Population characteristics of exposed/unexposed or cases/referents |  |
| 5. Response rates reported or implicitly given                        |  |
| 6. Methods for exposure ascertainment                                 |  |
| 7. Methods for outcome ascertainment                                  |  |
| 8. Statistical analysis                                               |  |
| <b>Completeness of reporting total score (0-8)</b>                    |  |

#### **D. Assessment of bias and confounding [sum range 0-16]**

|                                                                                               | Check | <p><b>High risk (2)</b> (likely risk of bias not addressed) *</p> <p><b>Uncertain risk (1)</b> (information not provided)</p> <p><b>Low risk (0)</b> (best practice)</p> <p><small>*If high risk: Justify your decision by short statements or quotes from the study</small></p> |
|-----------------------------------------------------------------------------------------------|-------|----------------------------------------------------------------------------------------------------------------------------------------------------------------------------------------------------------------------------------------------------------------------------------|
| 1. Reporting of tested hypotheses                                                             |       | <p>High risk: E.g., incomplete/selective reporting of tested hypotheses compared to objectives or available data</p> <p>Uncertain risk</p> <p>Low risk: E.g., estimates presented for all hypotheses</p>                                                                         |
| 2. Sample size justification (power calculations and/or addressing sample size in discussion) |       | <p>High risk: E.g., small numbers may increase risk of false negative reporting</p> <p>Uncertain risk</p> <p>Low risk: E.g., justification provided by authors</p>                                                                                                               |
| 3. Selection bias cohort studies (attrition)/ case-control studies (non-response)             |       | <p>High risk: E.g., loss to follow-up larger than 20% or differ more than 10% between exposed and unexposed</p> <p>Uncertain risk: E.g., not reported</p> <p>Low risk: E.g., loss to follow-up less than 20% with no difference between groups</p>                               |
| 4. Information bias (exposure ascertainment)                                                  |       | <p>High risk: E.g., exposure identified by patient recall in questionnaires or interviews</p> <p>Uncertain risk: E.g., methods not described</p> <p>Low risk: E.g., exposure identified by medical examination/record or from validated registries</p>                           |
| 5. Information bias (outcome ascertainment)                                                   |       | <p>High risk: E.g., outcome identified by patient recall in questionnaires or interviews</p> <p>Uncertain risk: E.g., methods not described</p> <p>Low risk: E.g., outcome identified by medical examination/record or from validated registries</p>                             |
| 6. Confounding (E.g., Are relevant factors considered? Judgement specific for outcome).       |       | <p>High risk: E.g., no confounding considered. Major confounding factors/effect modifiers (Mothers: maternal age, parity, SES, ethnicity, gestational age, pre-pregnancy BMI. Father: testicular cancer, age ethnicity. Sons: age at diagnosis).</p>                             |

|                                                       |  |                                                                                                               |
|-------------------------------------------------------|--|---------------------------------------------------------------------------------------------------------------|
|                                                       |  | Uncertain risk: E.g., adjustment for confounding factors not reported                                         |
|                                                       |  | Low risk: E.g., major confounding factors/effect modifiers adequately accounted for by design and/or analysis |
| 7. Measuring of confounding factors                   |  | High risk: E.g., non-valid or inadequate reporting or measures of confounding factors                         |
|                                                       |  | Uncertain risk: E.g., source and methods for collection of data not reported                                  |
|                                                       |  | Low risk: E.g., adequate, and non-differential ascertainment of information                                   |
| 8. Exposure-response                                  |  | High risk: E.g., exposure-response not addressed in the study                                                 |
|                                                       |  | Uncertain risk                                                                                                |
|                                                       |  | Low risk: E.g., exposure-response adequately addressed in the study                                           |
| <b><i>Bias and confounding total score (0-16)</i></b> |  |                                                                                                               |
