# Supplementary material for: Maternal Exposure to Cigarette Smoke during Pregnancy and Testicular Cancer in Offspring: A Systematic Review and Meta-Analysis
Source: MDPI journal article supplement (doi:10.3390/life13030618), 2023-02-23

**Figure S2.** Forest plot of studies assessing maternal exposure to cigarette smoke during pregnancy and risk of nonseminoma testicular cancer in offspring [30,33,37,38].

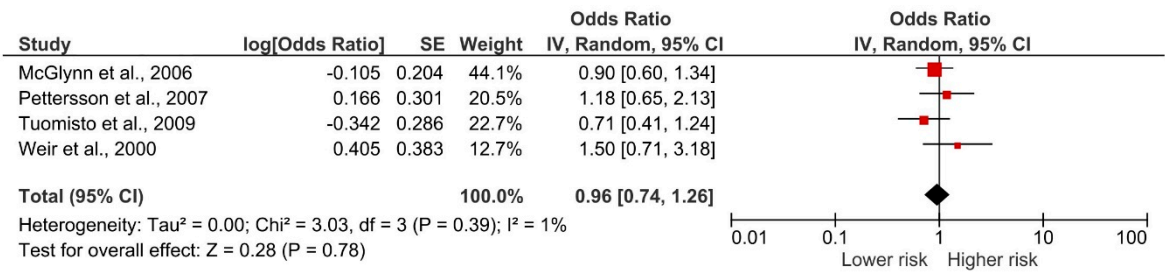

Supplement: s1 [file s1]
