# Supplementary material for: Maternal Exposure to Cigarette Smoke during Pregnancy and Testicular Cancer in Offspring: A Systematic Review and Meta-Analysis
Source: MDPI journal article supplement (doi:10.3390/life13030618), 2023-02-23
Supplement: s1 [file s1]

**Table S1.** Search protocol applied in the systematic literature search according to database and hits generated

| Date     | Database | Search string                                                                                                                                                                                                                                                                                                                                                                                                                                                                                                                                                                                                                                                                                                                                                                                                                                                                                                                                                                                                                                                                                                                                                                                                                                                                                                                                                                                                                                                                                                                                                                                                                                                                                                                                                                                                                                                                                                                                                                                                                                                                                                                                                                    | Hits (n)  |
|----------|----------|----------------------------------------------------------------------------------------------------------------------------------------------------------------------------------------------------------------------------------------------------------------------------------------------------------------------------------------------------------------------------------------------------------------------------------------------------------------------------------------------------------------------------------------------------------------------------------------------------------------------------------------------------------------------------------------------------------------------------------------------------------------------------------------------------------------------------------------------------------------------------------------------------------------------------------------------------------------------------------------------------------------------------------------------------------------------------------------------------------------------------------------------------------------------------------------------------------------------------------------------------------------------------------------------------------------------------------------------------------------------------------------------------------------------------------------------------------------------------------------------------------------------------------------------------------------------------------------------------------------------------------------------------------------------------------------------------------------------------------------------------------------------------------------------------------------------------------------------------------------------------------------------------------------------------------------------------------------------------------------------------------------------------------------------------------------------------------------------------------------------------------------------------------------------------------|-----------|
| 14/09/22 | PubMed   | <p><b>Block 1: Exposure</b></p> <p>"smoke"[MeSH Terms] OR "smoke"[All Fields] OR "smoke s"[All Fields] OR "smoked"[All Fields] OR "smokes"[All Fields] OR "Smoking"[MeSH Terms] OR "Smoking"[All Fields] OR "smokings"[All Fields] OR "smoking s"[All Fields] OR ("Nicotine"[MeSH Terms] OR "Nicotine"[All Fields] OR "nicotine s"[All Fields] OR "nicotines"[All Fields]) OR ("Cotinine"[MeSH Terms] OR "Cotinine"[All Fields] OR "cotinines"[All Fields]) OR "tobacco product"[All Fields] OR ("Tobacco"[MeSH Terms] OR "Tobacco"[All Fields] OR "Tobacco Products"[MeSH Terms] OR ("Tobacco"[All Fields] AND "products"[All Fields]) OR "Tobacco Products"[All Fields] OR "tobaccos"[All Fields] OR "tobacco s"[All Fields]) OR "electronic nicotine delivery system"[All Fields] OR "risk factor"[All Fields] OR "cigarette smok"[All Fields] OR "vaped"[All Fields] OR "Vaping"[MeSH Terms] OR "Vaping"[All Fields] OR "vapes"[All Fields] OR "Tobacco Smoke Pollution"[All Fields] OR ("Smoking"[MeSH Terms] OR "Nicotine"[MeSH Terms] OR "Cotinine"[MeSH Terms] OR "Tobacco Products"[MeSH Terms] OR "Tobacco"[MeSH Terms] OR "Electronic Nicotine Delivery Systems"[MeSH Terms] OR "Risk Factors"[MeSH Terms] OR "Cigarette Smoking"[MeSH Terms] OR "Vaping"[MeSH Terms] OR "Tobacco Smoke Pollution"[MeSH Terms]) OR "maternal smoking"[All Fields] OR "parental smoking"[All Fields] OR "paternal smoking"[All Fields] OR "electronic cigarette"[All Fields] OR "tobacco snuff"[All Fields] OR ("tobacco, smokeless"[MeSH Terms] OR ("Tobacco"[All Fields] AND "smokeless"[All Fields]) OR "smokeless tobacco"[All Fields] OR "snuff"[All Fields] OR "snuffs"[All Fields]) OR ("tobacco, smokeless"[MeSH Terms] OR ("Tobacco"[All Fields] AND "smokeless"[All Fields]) OR "smokeless tobacco"[All Fields] OR "snus"[All Fields]) OR "nicotine gum"[All Fields] OR "nicotine patch"[All Fields] OR ("smoking water pipes"[MeSH Terms] OR ("Smoking"[All Fields] AND "water"[All Fields] AND "pipes"[All Fields]) OR "smoking water pipes"[All Fields] OR "hookah"[All Fields] OR "hookahs"[All Fields])</p>                                                             | 1,632,345 |
|          |          | <p><b>Block 2: Outcome</b></p> <p>"Testicular Neoplasms"[MeSH Terms] OR "Germinoma"[MeSH Terms] OR "Seminoma"[MeSH Terms] OR "Nonseminomatous germ cell tumor"[Supplementary Concept] OR ("testicular neoplasm"[All Fields] OR ("Germinoma"[MeSH Terms] OR "Germinoma"[All Fields] OR "germinomas"[All Fields]) OR ("Seminoma"[MeSH Terms] OR "Seminoma"[All Fields] OR "seminomas"[All Fields]) OR "Nonseminomatous germ cell tumor"[All Fields] OR "nonseminomatous germ cell tumour"[All Fields] OR "testis tumor"[All Fields] OR "testis tumour"[All Fields] OR "germ cell tumor"[All Fields] OR "germ cell tumour"[All Fields] OR ("nonseminomatous"[All Fields] AND ("Germinoma"[MeSH Terms] OR "Germinoma"[All Fields] OR "germinomas"[All Fields])) OR (("teste"[All Fields] OR "testi"[All Fields] OR "testis"[MeSH Terms] OR "testis"[All Fields] OR "testes"[All Fields] OR "inferior colliculi"[MeSH Terms] OR ("inferior"[All Fields] AND "colliculi"[All Fields]) OR "inferior colliculi"[All Fields]) AND ("nonseminoma"[All Fields] OR "nonseminomas"[All Fields]) AND ("cancer s"[All Fields] OR "cancerated"[All Fields] OR "canceration"[All Fields] OR "cancerization"[All Fields] OR "cancerized"[All Fields] OR "cancerous"[All Fields] OR "neoplasms"[MeSH Terms] OR "neoplasms"[All Fields] OR "cancer"[All Fields] OR "cancers"[All Fields])) OR ("testicular"[All Fields] AND ("nonseminoma"[All Fields] OR "nonseminomas"[All Fields]) AND ("cancer s"[All Fields] OR "cancerated"[All Fields] OR "canceration"[All Fields] OR "cancerization"[All Fields] OR "cancerized"[All Fields] OR "cancerous"[All Fields] OR "neoplasms"[MeSH Terms] OR "neoplasms"[All Fields] OR "cancer"[All Fields] OR "cancers"[All Fields])) OR "testis cancer"[All Fields] OR "testicular cancer"[All Fields] OR "testis carcinoma"[All Fields] OR "testicular carcinoma"[All Fields] OR "testis neoplasm"[All Fields] OR "testicular tumor"[All Fields] OR "testicular tumour"[All Fields] OR ("nonseminoma"[All Fields] OR "nonseminomas"[All Fields]) OR "testis malignancy"[All Fields] OR "testicular malignancy"[All Fields] OR ("endocrinal"[All Fields] OR</p> | 56,450    |

|           |         |                                                                                                                                                                                                                                                                                                                                                                                                                                                                                                                                                                                                                                                                                                                                                                                                                                                                                                                                                                                                                                                                                                                                                                                                                                                                                                                                                                                                                                                                                                                                                                                                                                                                                                                                                       |           |
|-----------|---------|-------------------------------------------------------------------------------------------------------------------------------------------------------------------------------------------------------------------------------------------------------------------------------------------------------------------------------------------------------------------------------------------------------------------------------------------------------------------------------------------------------------------------------------------------------------------------------------------------------------------------------------------------------------------------------------------------------------------------------------------------------------------------------------------------------------------------------------------------------------------------------------------------------------------------------------------------------------------------------------------------------------------------------------------------------------------------------------------------------------------------------------------------------------------------------------------------------------------------------------------------------------------------------------------------------------------------------------------------------------------------------------------------------------------------------------------------------------------------------------------------------------------------------------------------------------------------------------------------------------------------------------------------------------------------------------------------------------------------------------------------------|-----------|
|           |         | <p>"endocrine system"[MeSH Terms] OR ("endocrine"[All Fields] AND "system"[All Fields]) OR "endocrine system"[All Fields] OR "endocrine"[All Fields] OR "endocrines"[All Fields] OR "endocrinic"[All Fields] OR "endocrinous"[All Fields] AND ("male"[MeSH Terms] OR "male"[All Fields]) AND "cancer"[All Fields] OR "testis germ cell tumor"[All Fields] OR "testis germ cell tumour"[All Fields] OR "testicular germ cell tumor"[All Fields] OR "testicular germ cell tumour"[All Fields])</p>                                                                                                                                                                                                                                                                                                                                                                                                                                                                                                                                                                                                                                                                                                                                                                                                                                                                                                                                                                                                                                                                                                                                                                                                                                                      |           |
|           |         | <p><b>Block 3: Window of exposure</b></p> <p>"Maternal Exposure"[MeSH Terms] OR "Prenatal Exposure Delayed Effects"[MeSH Terms] OR "maternal fetal exchange"[MeSH Terms] OR "Pregnancy"[MeSH Terms] OR "Fetus"[MeSH Terms] OR "maternal exposure"[All Fields] OR "prenatal exposure delayed effect"[All Fields] OR "maternal fetal exchange"[All Fields] OR "Pregnancy"[All Fields] OR "Fetus"[MeSH Terms] OR "Fetus"[All Fields] OR "fetuses"[All Fields] OR "fetus s"[All Fields] OR "foetu"[All Fields] OR "foetus"[All Fields] OR "Fetus"[MeSH Terms] OR "Fetus"[All Fields] OR "fetuses"[All Fields] OR "fetus s"[All Fields] OR "foetu"[All Fields] OR "foetus"[All Fields] OR "prenatal exposure"[All Fields] OR "mother fetus relationship"[All Fields] OR "mother"[All Fields] OR "pregnant woman"[All Fields] OR "pregnant women"[All Fields] OR "perinatal period"[All Fields] OR "prenatal period"[All Fields] OR "maternally"[All Fields] OR "maternities"[All Fields] OR "maternity"[All Fields] OR "mothers"[MeSH Terms] OR "mothers"[All Fields] OR "maternal"[All Fields] OR "in utero"[All Fields] OR "in utero"[All Fields] OR "fetale"[All Fields] OR "fetally"[All Fields] OR "fetals"[All Fields] OR "Fetus"[MeSH Terms] OR "Fetus"[All Fields] OR "fetal"[All Fields] OR "foetal"[All Fields] OR "fetale"[All Fields] OR "fetally"[All Fields] OR "fetals"[All Fields] OR "Fetus"[MeSH Terms] OR "Fetus"[All Fields] OR "fetal"[All Fields] OR "foetal"[All Fields] OR "gestation"[All Fields] OR "perinatal"[All Fields] OR "perinatally"[All Fields] OR "perinatals"[All Fields] OR "peri-natal"[All Fields] OR "prenatal"[All Fields] OR "prenatally"[All Fields] OR "prenatals"[All Fields] OR "pre-natal"[All Fields]</p> | 1,631,421 |
|           |         | <b>Block 1 AND Block 2 AND Block 3</b>                                                                                                                                                                                                                                                                                                                                                                                                                                                                                                                                                                                                                                                                                                                                                                                                                                                                                                                                                                                                                                                                                                                                                                                                                                                                                                                                                                                                                                                                                                                                                                                                                                                                                                                | 368       |
| 14/09/22* | Embase® | <p><b>Block 1: Exposure</b></p> <p>smoking.mp. or smoking/<br/> nicotine.mp. or nicotine/<br/> cotinine.mp. or cotinine/<br/> tobacco product*.mp.<br/> tobacco/ or tobacco.mp.<br/> electronic nicotine delivery system.mp.<br/> risk factor/ or risk factor*.mp.<br/> cigarette smoking.mp. or cigarette smoking/<br/> vaping.mp. or vaping/<br/> maternal smoking.mp. or maternal smoking/<br/> parental smoking.mp. or parental smoking/<br/> paternal smoking.mp. or paternal smoking/<br/> electronic cigarette.mp. or electronic cigarette/<br/> tobacco snuff.mp. or tobacco snuff/<br/> snus.mp. or snus/<br/> nicotine gum.mp. or nicotine gum/<br/> nicotine patch.mp. or nicotine patch/<br/> hookah.mp. or hookah/<br/> passive smoking.mp. or passive smoking/<br/> snuff.mp.<br/> tobacco smoke pollution.mp.</p>                                                                                                                                                                                                                                                                                                                                                                                                                                                                                                                                                                                                                                                                                                                                                                                                                                                                                                                      | 2,117,797 |
|           |         | <p><b>Block 2: Outcome</b></p> <p>testicular neoplasm.mp.<br/> germinoma.mp.<br/> seminoma/ or seminoma.mp.<br/> nonseminomatous germ cell tumor.mp.<br/> nonseminomatous germ cell tumour.mp.<br/> testis tumor.mp. or testis tumor/<br/> testis tumour.mp.<br/> germ cell tumor.mp. or germ cell tumor/</p>                                                                                                                                                                                                                                                                                                                                                                                                                                                                                                                                                                                                                                                                                                                                                                                                                                                                                                                                                                                                                                                                                                                                                                                                                                                                                                                                                                                                                                         | 50,801    |

|  |  |                                                                                                                                                                                                                                                                                                                                                                                                                                                                                                                                                                                                                                                                                                     |           |
|--|--|-----------------------------------------------------------------------------------------------------------------------------------------------------------------------------------------------------------------------------------------------------------------------------------------------------------------------------------------------------------------------------------------------------------------------------------------------------------------------------------------------------------------------------------------------------------------------------------------------------------------------------------------------------------------------------------------------------|-----------|
|  |  | nonseminomatous germinoma.mp. or non seminomatous germinoma/<br>testis nonseminoma cancer.mp. or testis nonseminoma cancer/<br>testicular nonseminoma cancer.mp.<br>testis cancer.mp. or testis cancer/<br>testicular cancer.mp.<br>testis carcinoma.mp. or testis carcinoma/<br>testicular carcinoma.mp.<br>testis neoplasm*.mp.<br>testicular tumor.mp.<br>nonseminoma.mp.<br>testis malignancy.mp.<br>testicular malignancy.mp.<br>endocrine male cancer.mp.<br>testis germ cell tumor.mp.<br>testis germ cell tumour.mp.<br>testicular tumour.mp.<br>testicular germ cell tumor.mp.<br>testicular germ cell tumour.mp.                                                                          |           |
|  |  | <b>Block 3: Window of exposure</b><br><br>maternal exposure.mp. or maternal exposure/<br>prenatal exposure delayed effects.mp.<br>maternal-fetal exchange.mp.<br>pregnancy.mp. or pregnancy/<br>fetus/ or fetus.mp.<br>foetus.mp.<br>prenatal exposure.mp. or prenatal exposure/<br>mother fetus relationship.mp. or mother fetus relationship/<br>mother.mp. or mother/<br>pregnant woman.mp. or pregnant woman/<br>pregnant women.mp.<br>perinatal period.mp. or perinatal period/<br>prenatal period.mp. or prenatal period/<br>maternal.mp.<br>in-utero.mp.<br>"in utero".mp.<br>fetal.mp.<br>foetal.mp.<br>gestational.mp.<br>perinatal.mp.<br>peri-natal.mp.<br>prenatal.mp.<br>pre-natal.mp. | 1,689,035 |
|  |  | <b>Block 1 AND Block 2 AND Block 3</b>                                                                                                                                                                                                                                                                                                                                                                                                                                                                                                                                                                                                                                                              | 381       |

/=EMTREE term

.mp. = Keyword term

\*View full search string below (if you wish to run it, you have to copy it and paste into Ovid Search History Launcher

- <https://demo.ovid.com/demo/ovidsptools/launcher/launcher.html>)
